# Supplementary material for: Genetic Polymorphisms of ACE1 Rs4646994 Associated with Lung Cancer in Patients with Pulmonary Nodules: A Case–Control Study
Source: MDPI journal article supplement (doi:10.3390/biomedicines11061549), 2023-05-26
Supplement: s1 [file s1]

# Genetic Polymorphisms of ACE1 Rs4646994 Associated with Lung Cancer in Patients with Pulmonary Nodules: A Case–Control Study

Rong Qiao<sup>1,†</sup>, Siyao Sang<sup>2,†</sup>, Jiajun Teng<sup>1,†</sup>, Hua Zhong<sup>1,\*</sup>, Hui Li<sup>2,3,\*</sup>, Baohui Han<sup>1,\*</sup>

**Table S1.** Correlations of genotype polymorphism in ACE1 rs4646994 and lung cancer risk in patients with pulmonary nodules according to gender.

| Gender | Genotype /allele | Case (n=300) | Control (n=100) | p-Value <sup>a</sup> | OR    | 95%CI        |
|--------|------------------|--------------|-----------------|----------------------|-------|--------------|
| Male   |                  | 135          | 44              |                      |       |              |
|        | II               | 52 (38.5%)   | 13 (29.5%)      | Reference            |       |              |
|        | ID               | 63 (46.7%)   | 28 (63.6%)      | 0.132                | 0.559 | 0.262-1.191  |
|        | DD               | 20 (14.8%)   | 3 (6.8%)        | 0.461                | 1.667 | 0.429-6.475  |
|        | DD vs. ID+II     |              |                 | 0.157                | 2.502 | 0.702-8.916  |
|        | I allele         | 167 (61.9%)  | 54 (61.4%)      | Reference            |       |              |
| Female | D allele         | 103 (38.1%)  | 34 (38.6%)      | 0.978                | 0.993 | 0.604-1.632  |
|        |                  | 165          | 56              |                      |       |              |
|        | II               | 69 (41.8%)   | 28 (50%)        | Reference            |       |              |
|        | ID               | 69 (41.8%)   | 25 (44.6%)      | 0.715                | 1.126 | 0.596-2.127  |
|        | DD               | 27 (16.4%)   | 3 (5.4%)        | 0.041                | 3.783 | 1.057-13.536 |
|        | DD vs. ID+II     |              |                 | 0.044                | 3.570 | 1.036-12.307 |
|        | I allele         | 207 (62.7%)  | 81 (72.3%)      | Reference            |       |              |
|        | D allele         | 123 (37.3%)  | 31 (27.7%)      | 0.059                | 1.574 | 0.982-2.523  |

CI, confidence interval; OR, odds ratio. <sup>a</sup> Logistic regression adjusted for age.

Case group versus control group.

**Table S2.** Correlations of genotype polymorphism in ACE1 rs4646994 with histological types of SCC and adenocarcinoma according to gender.

| Gender | Genotype /allele | LUAD (n=282) | SCC (n=14) | p-Value <sup>a</sup> | OR    | 95%CI        |
|--------|------------------|--------------|------------|----------------------|-------|--------------|
| Male   |                  | 118          | 14         |                      |       |              |
|        | II               | 43 (36.4%)   | 7 (50%)    | Reference            |       |              |
|        | ID               | 57 (48.3%)   | 6 (42.9%)  | 0.363                | 1.751 | 0.524-5.857  |
|        | DD               | 18 (15.3%)   | 1 (7.1%)   | 0.492                | 2.169 | 0.239-19.728 |
|        | DD vs. ID+II     |              |            | 0.426                | 2.340 | 0.288-19.012 |
|        | I allele         | 143 (60.6%)  | 20 (71.4%) | reference            |       |              |
|        | D allele         | 93 (39.4%)   | 8 (28.6%)  | 0.647                | 1.649 | 0.194-14.040 |

|               |              |             |   |           |   |   |
|---------------|--------------|-------------|---|-----------|---|---|
| <b>Female</b> |              | 164         | 0 |           |   |   |
|               | II           | 69 (42.1%)  | 0 | Reference |   |   |
|               | ID           | 69 (42.1%)  | 0 | -         | - | - |
|               | DD           | 26 (15.9)   | 0 | -         | - | - |
|               | DD vs. ID+II |             |   | -         | - | - |
|               | I allele     | 207 (63.1%) | 0 | Reference |   |   |
|               | D allele     | 121 (36.9%) | 0 | -         | - | - |

CI, confidence interval; OR, odds ratio. <sup>a</sup> Logistic regression adjusted for age.

LUAD group versus SCC group.

**Table S3.** Correlations of ACE1 rs4646994 genotype polymorphism with EGFR mutation in lung adenocarcinoma according to gender.

| <b>Gender</b> | <b>Genotype<br/>/allele</b> | <b>EGFR+<br/>(n=75)</b> | <b>EGFR<br/>(n=62)</b> | <b>p-Value <sup>a</sup></b> | <b>OR</b> | <b>95%CI</b> |
|---------------|-----------------------------|-------------------------|------------------------|-----------------------------|-----------|--------------|
| <b>Male</b>   |                             | 29                      | 32                     |                             |           |              |
|               | II                          | 10 (34.5%)              | 11 (34.4%)             | Reference                   |           |              |
|               | ID                          | 18 (62.1%)              | 14 (43.8%)             | 0.612                       | 1.335     | 0.436-4.086  |
|               | DD                          | 1 (3.4%)                | 7 (21.9%)              | 0.129                       | 0.171     | 0.018-1.670  |
|               | DD vs. ID+II                |                         |                        | 0.083                       | 0.145     | 0.016-1.284  |
|               | I allele                    | 38 (65.5%)              | 36 (56.2%)             | Reference                   |           |              |
|               | D allele                    | 20 (34.5%)              | 28 (43.8%)             | 0.253                       | 0.662     | 0.325-1.344  |
| <b>Female</b> |                             | 46                      | 30                     |                             |           |              |
|               | II                          | 22 (47.8%)              | 11 (36.7%)             | Reference                   |           |              |
|               | ID                          | 19 (41.3%)              | 12 (40%)               | 0.759                       | 0.848     | 0.296-2.409  |
|               | DD                          | 5 (10.9%)               | 7 (23.32%)             | 0.176                       | 0.384     | 0.096-1.534  |
|               | DD vs. ID+II                |                         |                        | 0.180                       | 0.416     | 0.115-1.501  |
|               | I allele                    | 63 (68.5%)              | 34 (56.7%)             | Reference                   |           |              |
|               | D allele                    | 29 (31.5%)              | 26 (43.3%)             | 0.190                       | 0.630     | 0.315-1.257  |

CI, confidence interval; OR, odds ratio. <sup>a</sup> Logistic regression adjusted for age.

EGFR+ group versus EGFR group.

**Table S4.** Correlations of genotype polymorphism in ACE1 rs4646994 and lung cancer risk in patients with pulmonary nodules according to age.

| <b>Age</b>    | <b>Genotype<br/>/allele</b> | <b>Case<br/>(n=300)</b> | <b>Control<br/>(n=100)</b> | <b>p-Value <sup>a</sup></b> | <b>OR</b> | <b>95%CI</b> |
|---------------|-----------------------------|-------------------------|----------------------------|-----------------------------|-----------|--------------|
| <b>≤45</b>    |                             | 48                      | 17                         |                             |           |              |
|               | II                          | 20 (41.7%)              | 7 (41.2%)                  | Reference                   |           |              |
|               | ID                          | 21 (43.8)               | 9 (52.9%)                  | 0.669                       | 0.767     | 0.227-2.590  |
|               | DD                          | 7 (14.6)                | 1 (5.9%)                   | 0.498                       | 2.216     | 0.222-22.154 |
|               | DD vs. ID+II                |                         |                            | 0.399                       | 2.573     | 0.287-23.077 |
|               | I allele                    | 201 (63.8%)             | 50 (61.0%)                 | Reference                   |           |              |
|               | D allele                    | 114 (36.2%)             | 32 (39.0%)                 | 0.625                       | 0.882     | 0.534-1.458  |
| <b>&gt;45</b> |                             | 252                     | 83                         |                             |           |              |
|               | II                          | 101 (40.1%)             | 34 (41.0%)                 | Reference                   |           |              |

|              |             |             |           |       |             |
|--------------|-------------|-------------|-----------|-------|-------------|
| ID           | 111 (44.0%) | 44 (53.0%)  | 0.512     | 0.838 | 0.493-1.423 |
| DD           | 40 (15.9%)  | 5 (6%)      | 0.030     | 3.111 | 1.119-8.651 |
| DD vs. ID+II |             |             | 0.014     | 3.423 | 1.284-9.126 |
| I allele     | 313 (62.1%) | 112 (67.5%) | Reference |       |             |
| D allele     | 191 (37.9%) | 54 (32.5%)  | 0.146     | 1.322 | 0.908-1.926 |

CI, confidence interval; OR, odds ratio. <sup>a</sup> Logistic regression adjusted for sex and age.

Case group versus control group.

**Table S5.** Correlations of genotype polymorphism in ACE1 rs4646994 with histological types of SCC and adenocarcinoma according to age.

| Age | Genotype<br>/allele | LUAD<br>(n=282) | SCC<br>(n=14) | <i>p</i> -Value <sup>a</sup> | OR        | 95%CI        |
|-----|---------------------|-----------------|---------------|------------------------------|-----------|--------------|
| ≤45 |                     | 48              | 0             |                              |           |              |
|     | II                  | 20 (41.7%)      | 0             |                              | Reference |              |
|     | ID                  | 21 (43.8%)      | 0             | -                            | -         | -            |
|     | DD                  | 7 (14.6%)       | 0             | -                            | -         | -            |
|     | DD vs. ID+II        | -               | -             | -                            | -         | -            |
|     | I allele            | 61 (63.5%)      | 0             |                              | Reference |              |
|     | D allele            | 35 (36.5%)      | 0             | -                            | -         | -            |
| >45 |                     | 234             | 14            |                              |           |              |
|     | II                  | 92 (39.3%)      | 7 (50%)       |                              | Reference |              |
|     | ID                  | 105 (44.9%)     | 6 (42.9%)     | 0.458                        | 1.556     | 0.484-4.996  |
|     | DD                  | 37 (15.8%)      | 1 (7.1%)      | 0.342                        | 2.872     | 0.326-25.268 |
|     | DD vs. ID+II        |                 |               | 0.441                        | 2.286     | 0.279-18.707 |
|     | I allele            | 289 (61.8%)     | 20 (71.4%)    | Reference                    |           |              |
|     | D allele            | 179 (38.2%)     | 8 (28.6%)     | 0.277                        | 1.615     | 0.680-3.835  |

CI, confidence interval; OR, odds ratio. <sup>a</sup> Logistic regression adjusted for sex.

LUAD group versus SCC group.

**Table S6.** Correlations of ACE1 rs4646994 genotype polymorphism with EGFR mutation in lung adenocarcinoma according to age.

| Age | Genotype<br>/allele | EGFR+<br>(n=75) | EGFR<br>(n=62) | <i>p</i> -Value <sup>a</sup> | OR        | 95%CI       |
|-----|---------------------|-----------------|----------------|------------------------------|-----------|-------------|
| ≤45 |                     | 9               | 10             |                              |           |             |
|     | II                  | 4 (44.4%)       | 3 (30%)        |                              | Reference |             |
|     | ID                  | 5 (55.6%)       | 4 (40%)        | 0.942                        | 0.929     | 0.126-6.842 |
|     | DD                  | 0               | 3 (30%)        | 0.999                        | 0         | 0           |
|     | DD vs. ID+II        |                 |                | 0.999                        | 0         | 0           |
|     | I allele            | 13 (72.2%)      | 10 (50%)       |                              | Reference |             |
|     | D allele            | 5 (27.8%)       | 10 (50%)       | 0.183                        | 0.396     | 0.102-1.548 |
| >45 |                     | 66              | 52             |                              |           |             |
|     | II                  | 28 (42.4%)      | 19 (36.5%)     |                              | Reference |             |
|     | ID                  | 32 (48.5%)      | 22 (42.3%)     | 0.824                        | 1.097     | 0.485-2.481 |
|     | DD                  | 6 (9.1%)        | 11 (21.2%)     | 0.084                        | 0.356     | 0.110-1.148 |

|              |            |            |       |           |             |
|--------------|------------|------------|-------|-----------|-------------|
| DD vs. ID+II |            |            | 0.053 | 0.340     | 0.114-1.013 |
| I allele     | 88 (66.7%) | 60 (57.7%) |       | Reference |             |
| D allele     | 44 (33.3%) | 44 (42.3%) | 0.175 | 1.451     | 0.848-2.484 |

CI, confidence interval; OR, odds ratio. <sup>a</sup> Logistic regression adjusted for sex.

EGFR+ group versus EGFR group.
